# Supplementary material for: Polymorphisms Related to Iron Homeostasis Associate with Liver Disease in Chronic Hepatitis C
Source: MDPI journal article supplement (doi:10.3390/v15081710), 2023-08-09
Supplement: s1 [file s1]

## Supplementary data

### **Polymorphisms Related to Iron Homeostasis Associate with Liver Disease in Chronic Hepatitis C**

Anna Wróblewska, Anna Woziwodzka, Magda Rybicka-Misiejko, Krzysztof P. Bielawski, Katarzyna Sikorska

|                                                                                                                                                                     |    |
|---------------------------------------------------------------------------------------------------------------------------------------------------------------------|----|
| <b>Table S1.</b> Characteristics of patients selected for the study.....                                                                                            | 2  |
| <b>Figure S1.</b> Reverse Kaplan-Meier curve showing patients follow up time.....                                                                                   | 3  |
| <b>Figure S2.</b> Summary of the therapeutic outcome for patients included in the study.....                                                                        | 4  |
| <b>Table S2.</b> Primers used for quantitative gene expression analysis.....                                                                                        | 5  |
| <b>Table S3.</b> Genotype distribution within single-nucleotide polymorphisms selected for the study in chronic hepatitis C patients.....                           | 6  |
| <b>Table S4.</b> Construction of logistic regression model for HCC occurrence.....                                                                                  | 7  |
| <b>Figure S3.</b> ROC curves for validated logistic regression models for HCC occurrence.....                                                                       | 8  |
| <b>Table S5.</b> Polymorphisms associated with biochemical and histopathological data.....                                                                          | 9  |
| <b>Table S6.</b> SNPs associated with hepatic iron-related gene expression normalized to serum iron indices.....                                                    | 10 |
| <b>Table S7.</b> Spearman rank correlation coefficients for associations between hepatic gene expression and baseline biochemical parameters for CHC patients ..... | 11 |
| <b>Figure S4.</b> Hepatic expression of co-inhibitory receptors in relation to selected genotypes.....                                                              | 12 |

**Table S1.** Characteristics of patients selected for the study.

| Variable                                                                                                                                                                             | Characteristics                                 |
|--------------------------------------------------------------------------------------------------------------------------------------------------------------------------------------|-------------------------------------------------|
| Gender (Male/Female)                                                                                                                                                                 | 153/96                                          |
| Age (yr)                                                                                                                                                                             | 19 - 78 (50)                                    |
| Hemoglobin (g/dL)                                                                                                                                                                    | 9.6 – 18.4 (14.9)                               |
| ALT (IU/L)                                                                                                                                                                           | 14-852 (79)                                     |
| AST (IU/L)                                                                                                                                                                           | 3-369 (59.5)                                    |
| GGT (IU/L)                                                                                                                                                                           | 9-663 (70)                                      |
| Bilirubin (mg/dL)                                                                                                                                                                    | 0.2-4.2 (0.7)                                   |
| Iron (µg/dL)                                                                                                                                                                         | 29-357 (146)                                    |
| Transferrin saturation (%)                                                                                                                                                           | 6-100 (40)                                      |
| Ferritin (ng/mL)                                                                                                                                                                     | 7-3410 (218)                                    |
| Inflammation grade (0-3)                                                                                                                                                             | 2 (2/2)                                         |
| Fibrosis grade (0-4)                                                                                                                                                                 | 2 (1/3)                                         |
| Iron deposits grade (0-3)                                                                                                                                                            | 0 (0/1)                                         |
| Steatosis grade (0-3)                                                                                                                                                                | 1 (0/2)                                         |
| HCV genotype (n=131)                                                                                                                                                                 | 120 genotype 1<br>15 genotype 3<br>9 genotype 4 |
| HCV RNA (kIU/mL) (n=89)                                                                                                                                                              | 37-24047 (1390)                                 |
| Median observation time [years]                                                                                                                                                      | 6.1 (min-max 1.5-20)                            |
| Median follow up time [years]                                                                                                                                                        | 6.3 (75% CI 2.9-9.3)                            |
| HCC yes/no                                                                                                                                                                           | 19/230                                          |
| Quantitative variables are presented as minimal - maximal values (median). Histopathological data is shown as median values with percentiles (25 <sup>th</sup> / 75 <sup>th</sup> ). |                                                 |

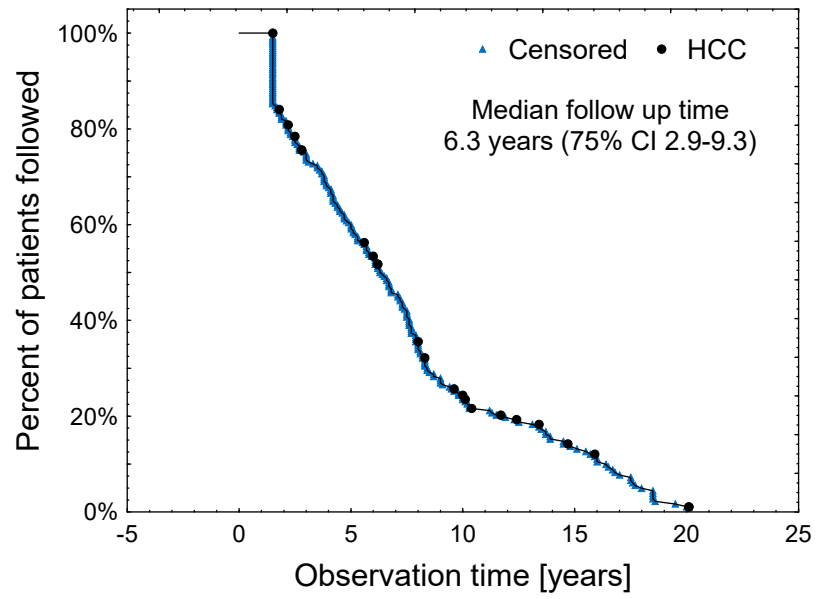

**Figure S1.** Reverse Kaplan-Meier curve showing patients follow up time.

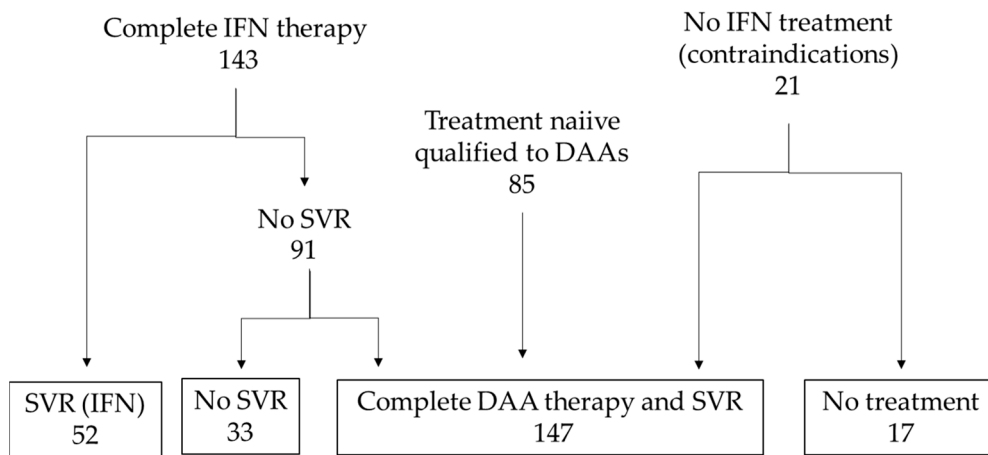

**Figure S2.** Summary of the therapeutic outcome for patients included in the study.

**Table S2.** Primers used for quantitative gene expression analysis.

| Primer name | Primer sequence 5'-->3' | Reference  |
|-------------|-------------------------|------------|
| GUS_F       | CGAGAGTGCTGGGGAATAAA    | [18]       |
| GUS_R       | CCTGGTTTCATTGGCAATCT    |            |
| HAMP_F      | AGACACCCACTTCCCCATCT    | [18]       |
| HAMP_R      | CACATCCCACACTTTGATCG    |            |
| FPN1_F      | CAGGGACTGAGTGGTTCCAT    | [18]       |
| FPN1_R      | ACCACATTTTCGACGTAGCC    |            |
| HJV_F       | GGCCTAGGAGACACGTGAAA    | [20]       |
| HJV_R       | GAGGCTGGAAAAATTGGTGA    |            |
| TFR2_F      | GACCCTGCAGTGGGTGTACT    | [20]       |
| TFR2_R      | CAGTCGCTCGTCTCTCTCCT    |            |
| HO-1_F      | GAAAAGCACATCCAGGCAAT    | [20]       |
| HO-1_R      | CTGCTGCAGGAAGTGGGAT     |            |
| ID1_F       | TGTTCCATTTTCCGTATCTGC   | [20]       |
| ID1_R       | TGAAACAGAATGGGCAAAGC    |            |
| BMP6_F      | CTTACGACAAGCAGCCCTTC    | [20]       |
| BMP6_R      | CACGTGCACCTCACTCACTT    |            |
| CTLA4_F     | CTGTGCGGCAACCTACATGA    | this study |
| CTLA4_R     | TGCAGATGTAGAGTCCCGTG    |            |
| PD-1_F      | GCCTGTGTTCTCTGTGGACT    | this study |
| PD-1_R      | ATGGTGGCATACTCCGTCTG    |            |
| Tim3_F      | GGAGCCTGTCCTGTGTTTGA    | this study |
| Tim3_R      | AGGGACACATCTCCTTTGCG    |            |

**Table S3.** Genotype distribution within single-nucleotide polymorphisms selected for the study in chronic hepatitis C patients.

| N<br>o | Gene                                                               | dbSNP ID /<br>mutation   | SNP associated<br>with                                                               | Consequence<br>type                                                     | MAF<br>(TOPMed)         | Clinical<br>significance                                                                                                               | Ref.                       | Genotype | No of<br>cases # | Freq.# |      |
|--------|--------------------------------------------------------------------|--------------------------|--------------------------------------------------------------------------------------|-------------------------------------------------------------------------|-------------------------|----------------------------------------------------------------------------------------------------------------------------------------|----------------------------|----------|------------------|--------|------|
| 1      | Hemochromatosis<br>(HFE)                                           | rs1800562<br>G>A / C282Y | serum transferrin<br>and sFe in<br>healthy<br>individuals                            | missense variant<br>(different aa<br>sequence), 2KB<br>upstream variant | A=0.053                 | Hereditary<br>hemochromat<br>osis;<br>complications<br>of diabetes,<br>Alzheimer<br>disease;<br>familial<br>porphyria<br>cutanea tarda | [6]                        | GG       | 233              | 0.94   |      |
|        |                                                                    |                          |                                                                                      |                                                                         |                         |                                                                                                                                        |                            | GA       | 16               | 0.06   |      |
|        |                                                                    |                          |                                                                                      |                                                                         |                         |                                                                                                                                        |                            | AA       | 0                | 0      |      |
| 2      |                                                                    | rs1800730<br>A>T / S65C  |                                                                                      | missense variant,<br>non coding<br>transcript variant                   | T=0.009                 |                                                                                                                                        |                            | AA       | 241              | 0.97   |      |
|        |                                                                    |                          |                                                                                      |                                                                         |                         |                                                                                                                                        |                            | AT       | 8                | 0.03   |      |
|        |                                                                    |                          |                                                                                      |                                                                         |                         |                                                                                                                                        |                            | TT       | 0                | 0      |      |
| 3      |                                                                    | rs1799945<br>C>G / H63D  |                                                                                      |                                                                         | G=0.100                 |                                                                                                                                        |                            | CC       | 172              | 0.7    |      |
|        |                                                                    |                          |                                                                                      |                                                                         |                         |                                                                                                                                        |                            | CG       | 68               | 0.3    |      |
|        |                                                                    |                          |                                                                                      |                                                                         |                         |                                                                                                                                        |                            | GG       | 9                | 0.04   |      |
| 4      | Transferrin receptor<br>2 (TFR2)                                   | rs7385804<br>A>C         | sFe levels in<br>healthy<br>individuals                                              | Intron variant                                                          | C=0.334                 | not reported in<br>ClinVar                                                                                                             | [7]                        | AA       | 71               | 0.3    |      |
|        |                                                                    |                          |                                                                                      |                                                                         |                         |                                                                                                                                        |                            | AC       | 128              | 0.5    |      |
|        |                                                                    |                          |                                                                                      |                                                                         |                         |                                                                                                                                        |                            | CC       | 50               | 0.2    |      |
| 5      | Histone deacetylase 2<br>(HDAC2)                                   | rs3778216<br>C>T         | hepcidin<br>expression;<br>cellular iron<br>metabolism,                              | Intron variant                                                          | T=0.218                 | not reported in<br>ClinVar                                                                                                             | [34,36]                    | CC       | 132              | 0.5    |      |
|        |                                                                    |                          | inflammatory<br>response                                                             |                                                                         |                         |                                                                                                                                        |                            | CT       | 104              | 0.4    |      |
|        |                                                                    |                          |                                                                                      |                                                                         |                         |                                                                                                                                        |                            | TT       | 13               | 0.1    |      |
| 6      | Histone deacetylase 3<br>(HDAC3)                                   | rs976552<br>T>G          |                                                                                      |                                                                         | 2KB Upstream<br>variant | C=0.210                                                                                                                                | not reported in<br>ClinVar |          | TT               | 162    | 0.7  |
|        |                                                                    |                          |                                                                                      |                                                                         |                         |                                                                                                                                        |                            | TG       | 81               | 0.3    |      |
|        |                                                                    |                          |                                                                                      |                                                                         |                         |                                                                                                                                        |                            | GG       | 6                | 0.02   |      |
| 7      | Histone deacetylase 5<br>(HDAC5)                                   | rs368328<br>A>G          |                                                                                      | Intron variant                                                          | G=0.328                 | not reported in<br>ClinVar                                                                                                             |                            | AA       | 109              | 0.4    |      |
|        |                                                                    |                          |                                                                                      |                                                                         |                         |                                                                                                                                        |                            | AG       | 112              | 0.4    |      |
|        |                                                                    |                          |                                                                                      |                                                                         |                         |                                                                                                                                        |                            | GG       | 28               | 0.1    |      |
| 8      | Transmembrane<br>serine proteinase 2,<br>matriptase-2<br>(TMPRSS6) | rs855791 C><br>T         | sFe, TS; blood<br>hepcidin mRNA<br>and protein in<br>urine in healthy<br>individuals | missense variant                                                        | A=0.361                 | microcytic<br>anemia, iron-<br>refractory iron<br>deficiency<br>anemia                                                                 | [8-9]                      | CC       | 92               | 0.4    |      |
|        |                                                                    |                          |                                                                                      |                                                                         |                         |                                                                                                                                        |                            |          | CT               | 128    | 0.5  |
|        |                                                                    |                          |                                                                                      |                                                                         |                         |                                                                                                                                        |                            |          | TT               | 29     | 0.1  |
| 9      | Duodenal<br>cytochrome b<br>(CYBRD1)                               | rs884409<br>T>G          | serum TS and<br>ferritin<br>concentration                                            | 2 KB upstream<br>sequence variant                                       | G=0.218                 | not reported in<br>ClinVar                                                                                                             | [20,40-<br>41]             | TT       | 163              | 0.6    |      |
|        |                                                                    |                          |                                                                                      |                                                                         |                         |                                                                                                                                        |                            |          | TG               | 73     | 0.3  |
|        |                                                                    |                          |                                                                                      |                                                                         |                         |                                                                                                                                        |                            |          | GG               | 13     | 0.04 |

sFe -serum iron; TS – transferrin saturation; MAF (TOPMed) – minor allele frequency from TOPMed Programme; #this study

**Table S4.** Construction of logistic regression model for HCC occurrence.

| Input variables                                        | p*        | Multivariate logistic regression model |                                                                  |              |           |                           |           |
|--------------------------------------------------------|-----------|----------------------------------------|------------------------------------------------------------------|--------------|-----------|---------------------------|-----------|
|                                                        |           | Model no                               | Variables in the model                                           | Training set |           | Cross-validated (10-fold) |           |
|                                                        |           |                                        |                                                                  | AUC          | AUC error | AUC                       | AUC error |
| AST                                                    | <0.000001 | <b>1</b>                               | AST                                                              | 0.842        | 0.05      | 0.808                     | 0.06      |
| sFe                                                    | 0.00009   | <b>2</b>                               | AST+sFe                                                          | 0.850        | 0.05      | 0.827                     | 0.05      |
| Minor <i>HDAC3</i> rs976552/<br><i>CYBRD1</i> rs884409 | 0.0003    | <b>3</b>                               | AST+sFe+ALT                                                      | 0.883        | 0.07      | 0.738                     | 0.11      |
| Liver inflammation grade                               | 0.0003    | <b>4</b>                               | AST+sFe+ALT+ Minor <i>HDAC3</i> rs976552/ <i>CYBRD1</i> rs884409 | 0.871        | 0.05      | 0.839                     | 0.06      |
| TS                                                     | 0.0009    |                                        |                                                                  |              |           |                           |           |
| ALT                                                    | 0.004     |                                        |                                                                  |              |           |                           |           |
| Age                                                    | 0.021     |                                        |                                                                  |              |           |                           |           |
| Billirubin                                             | 0.023     |                                        |                                                                  |              |           |                           |           |
| GGT                                                    | 0.039     |                                        |                                                                  |              |           |                           |           |
| sFerritin                                              | 0.047     |                                        |                                                                  |              |           |                           |           |

\* p values for monovariate logistic regression analysis. **Model 3** was automatically constructed using backward stepwise regression with all the listed variables significant in the monovariate analysis as an input. **Model 1**, **Model 2** and **Model 4** were evaluated for comparison.

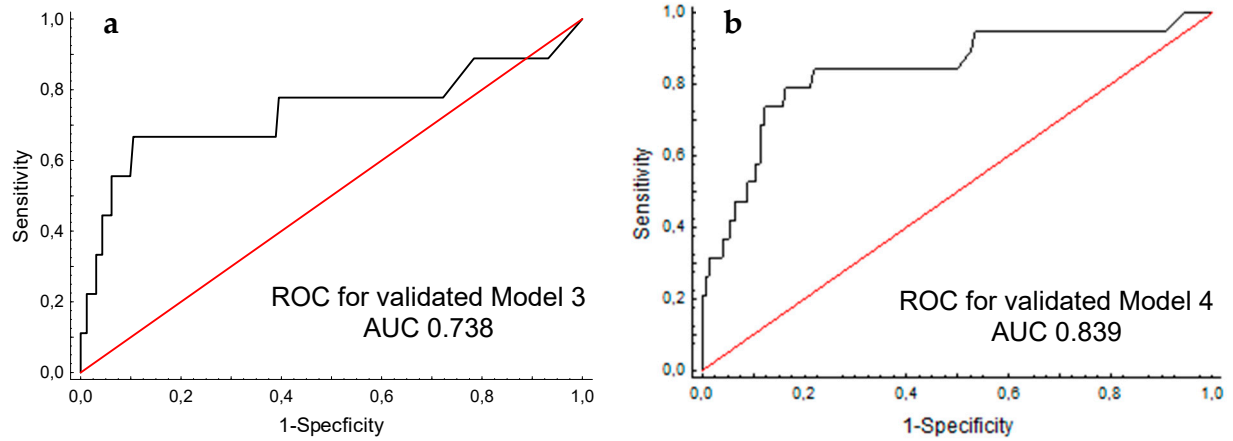

**Figure S3.** ROC curves for validated logistic regression models for HCC occurrence. Model 3 (**a**) was generated automatically using backward stepwise regression with all the variables significant in the monovariate analysis as an input, and Model 4 (**b**) contained additionally minor allele status in *HDAC3* rs976552/ *CYBRD1* rs884409 for comparison.



**Table S5.** Polymorphisms associated with biochemical and histopathological data.

| Parameter                                 | Polymorphism            |                |              |                        |               |              |                    |             |              |                     |                |              |                                          |                         |              |
|-------------------------------------------|-------------------------|----------------|--------------|------------------------|---------------|--------------|--------------------|-------------|--------------|---------------------|----------------|--------------|------------------------------------------|-------------------------|--------------|
|                                           | HFE C282Y rs1800562 G>A |                |              | HFE H63D rs1799945 C>G |               |              | HDAC3 rs976552 T>G |             |              | CYBRD1 rs884409 T>G |                |              | Minor HDAC3 rs976552/<br>CYBRD1 rs884409 |                         |              |
|                                           | GG<br>n=233             | GA<br>n=16     | P            | CC+CG<br>n=240         | GG<br>n=9     | P            | TT+GT<br>n=243     | GG<br>n=6   | P            | TT<br>n=163         | GG+GT<br>n=86  | P            | TT in any<br>SNP<br>n=213                | GG+GT/<br>GG+GT<br>n=36 | p            |
| Age [yr]                                  | 47±1                    | 52±2           | 0.172        | 48±1                   | 52±2          | 0.337        | 48±1               | 41±7        | 0.391        | 47±1                | 49±1           | 0.694        | 48±1                                     | 46±2                    | 0.175        |
| Sex (Male/Female)                         | <b>138/95</b>           | <b>15/1</b>    | <b>0.013</b> | 90/150                 | 6/3           | 0.436        | 150/93             | 3/3         | 0.874        | 99/64               | 54/32          | 0.751        | 83/130                                   | 13/23                   | 0.872        |
| HGB [g/dL]                                | 14.7±0.1                | 15.4±0.3       | 0.082        | 14.8±0.1               | 14.0±0.6      | 0.291        | 14.7±0.1           | 15.1±0.8    | 0.577        | 14.8±0.1            | 14.6±0.2       | 0.237        | 14.7±0.1                                 | 14.8±0.3                | 0.858        |
| ALT [IU/L]                                | <b>111±6.2</b>          | <b>167±27</b>  | <b>0.019</b> | 112±6                  | 170±35        | 0.050        | 116±6              | 57±12       | 0.064        | <b>106±7</b>        | <b>131±11</b>  | <b>0.036</b> | 111±7                                    | 139±16                  | 0.079        |
| AST [IU/L]                                | 79±4                    | 91±16          | 0.382        | <b>78±4</b>            | <b>123±22</b> | <b>0.016</b> | <b>80±4</b>        | <b>39±7</b> | <b>0.035</b> | <b>69±4</b>         | <b>98±8</b>    | <b>0.002</b> | <b>74±4</b>                              | <b>111±13</b>           | <b>0.002</b> |
| GGT [IU/L]                                | 101±6                   | 109±19         | 0.226        | 103±6                  | 58±12         | 0.189        | 102±6              | 85±116      | 0.372        | <b>87±6</b>         | <b>129±13</b>  | <b>0.016</b> | 97±7                                     | 129±17                  | 0.127        |
| Bilirubin [mg/dL]                         | 0.9±0.04                | 0.8±0.1        | 0.925        | 0.9±0.04               | 0.8±0.1       | 0.439        | 0.9±0.04           | 0.6±0.1     | 0.142        | <b>0.8±0.04</b>     | <b>1.0±0.1</b> | <b>0.009</b> | 0.8±0.04                                 | 0.9±0.1                 | 0.769        |
| Serum iron [µg/dL]                        | 151±5                   | 179±13         | 0.067        | 151±4                  | 192±29        | 0.152        | 153±4              | 125±14      | 0.392        | <b>145±5</b>        | <b>167±7</b>   | <b>0.011</b> | 150±5                                    | 167±12                  | 0.161        |
| Transferrin saturation [%]                | <b>42±1.5</b>           | <b>56±6</b>    | <b>0.011</b> | 43±2                   | 51±9          | 0.339        | 43±2               | 34±3        | 0.330        | 40±2                | 48±3           | 0.078        | 42±2                                     | 46±5                    | 0.764        |
| Ferritin [ng/mL]                          | <b>348±27</b>           | <b>708±220</b> | <b>0.004</b> | 372±30                 | 339±95        | 0.998        | 375±30             | 117±48      | 0.126        | 343±35              | 420±52         | 0.170        | 366±33                                   | 394±63                  | 0.710        |
| <b>Histopathology n=211</b>               | n=197                   | n=14           | p            | n=205                  | n=6           | p            | n=206              | n=5         | p            | n=140               | n=71           | p            | n=181                                    | n=30                    | p            |
| Inflammation grade (0-3)                  | 2(1/2)                  | 2(2/3)         | 0.150        | 2(2/2)                 | 2(1.5/2)      | 0.818        | 2(2/2)             | 2(2/2)      | 0.718        | <b>2(1/2)</b>       | <b>2(2/3)</b>  | <b>0.013</b> | <b>2(1/2)</b>                            | <b>2(2/3)</b>           | <b>0.021</b> |
| Fibrosis grade (0-4)                      | 2(1/3)                  | 2(1/3)         | 0.842        | 2(1/3)                 | 1.5(1/2)      | 0.289        | 2(1/3)             | 1(1/2)      | 0.277        | 2(1/3)              | 2(1/3)         | 0.095        | 2(1/3)                                   | 2(2/3)                  | 0.191        |
| Iron deposits grade (0-3)                 | 1(0/1)                  | 1(0/2)         | 0.154        | 0(0/1)                 | 0(0/1)        | 0.761        | 0(0/1)             | 0(0/0)      | 0.179        | 0(0/1)              | 0(0/1)         | 0.890        | 0(0/1)                                   | 0(0/1)                  | 0.698        |
| Steatosis grade (0-3)                     | 1(0/2)                  | 2(0/2)         | 0.292        | 1(0/2)                 | 0.5(0/2)      | 0.772        | 1(0/2)             | 2(0/2)      | 0.832        | 1(0/2)              | 1(0/2)         | 0.292        | 1(0/2)                                   | 1(0/2)                  | 0.610        |
| Hepatocyte iron deposits present (yes/no) | 68/129                  | 8/6            | 0.161        | 75/130                 | 1/5           | 0.871        | 76/130             | 0/5         | 0.217        | 50/90               | 26/45          | 0.926        | 65/116                                   | 11/19                   | 0.883        |
| Hepatocyte steatosis present (yes/no)     | 117/80                  | 9/5            | 0.937        | 123/82                 | 3/3           | 0.944        | 123/83             | 3/2         | 0.654        | <b>76/64</b>        | <b>50/21</b>   | <b>0.023</b> | 107/74                                   | 19/11                   | 0.814        |
| Liver fibrosis present (yes/no)           | 122/75                  | 9/5            | 0.913        | 128/77                 | 3/3           | 0.848        | 129/77             | 2/3         | 0.573        | 82/58               | 49/22          | 0.140        | 110/71                                   | 21/9                    | 0.446        |

Quantitative biochemical data is shown as mean ± SE; histopathological data is shown as median values with percentiles (25<sup>th</sup>/ 75<sup>th</sup>).

**Table S6.** SNPs associated with hepatic iron-related gene expression normalized to serum iron indices.

| Parameter               | HFE C282Y rs1800562 G>A |                |              | HFE S65C rs1800730 A>T |                |              | HFE H63D rs1799945 C>G |             |    | HDAC2 rs3778216 C>T |             |              | TMPRSSR6 rs855791 C>T |             |              |
|-------------------------|-------------------------|----------------|--------------|------------------------|----------------|--------------|------------------------|-------------|----|---------------------|-------------|--------------|-----------------------|-------------|--------------|
|                         | GG n=233                | GA n=16        | p            | AA n=241               | AT n=8         | p            | CC n=172               | GC+GG n=77  | p  | CC n=132            | CT+TT n=117 | p            | CC+CT n=220           | TT n=29     | p            |
| sFerritin               | <b>347±27</b>           | <b>707±221</b> | <b>0.004</b> | 367±30                 | 459±150        | ns           | 388±39                 | 331±35      | ns | 155±6               | 149±7       | ns           | 381±32                | 289±60      | ns           |
| sFe                     | 150±5                   | 178±13         | ns           | 152±4                  | 150±38         | ns           | 149±5                  | 161±8       | ns | 410±45              | 323±34      | ns           | 154±5                 | 141±12      | ns           |
| <b>Gene expression</b>  | <b>n=116</b>            | <b>n=8</b>     |              | <b>n=118</b>           | <b>n=6</b>     |              | <b>n=85</b>            | <b>n=39</b> |    | <b>n=71</b>         | <b>n=53</b> |              | <b>n=111</b>          | <b>n=13</b> |              |
| <i>HAMP</i>             | 1.6±0.1                 | 1.9±0.3        | ns           | <b>1.6±0.1</b>         | <b>2.9±0.6</b> | <b>0.029</b> | 1.9±0.3                | 1.5±0.1     | ns | 1.8±0.1             | 1.6±0.2     | ns           | 1.7±0.1               | 1.6±0.3     | ns           |
| <i>FPN1</i>             | 14±1                    | 10±2           | ns           | 14±0.8                 | 13±3.4         | <b>ns</b>    | 13±1                   | 14±2        | ns | 13±1.0              | 15±1.3      | ns           | 14±1                  | 11±2        | ns           |
| <b>Ratio*</b>           |                         |                |              |                        |                |              |                        |             |    |                     |             |              |                       |             |              |
| <i>Tfr2</i> / sFerritin | <b>13±2</b>             | <b>3±1</b>     | <b>0.008</b> | 5±1                    | 12±2           | ns           | 11±4                   | 13±2        | ns | 10±2                | 16±4        | ns           | 12±2                  | 11±3        | ns           |
| <i>HAMP</i> / sFerritin | 9±2                     | 4±1            | ns           | 8±2                    | 9±2            | ns           | 6±1                    | 10±2        | ns | 9±2                 | 8±2         | ns           | 9±2                   | 11±3        | ns           |
| <i>Hjv</i> / sFerritin  | <b>10±2</b>             | <b>2±1</b>     | <b>0.007</b> | 4±1                    | 10±2           | ns           | 8±2                    | 10±2        | ns | <b>7±1</b>          | <b>13±3</b> | <b>0.046</b> | 9±3                   | 11±4        | ns           |
| <i>Bmp6</i> / sFerritin | <b>10±1</b>             | <b>2±1</b>     | <b>0.010</b> | 4±1                    | 10±1           | ns           | 7±1                    | 11±2        | ns | <b>7±1</b>          | <b>12±2</b> | <b>0.049</b> | 9±1                   | 11±4        | ns           |
| <i>Id1</i> / sFerritin  | 10±1                    | 6±3            | ns           | 6±1                    | 10±1           | ns           | 8±1                    | 10±1        | ns | 9±1                 | 10±1        | ns           | 9±1                   | 13±4        | ns           |
| <i>HO1</i> / sFerritin  | <b>17±2</b>             | <b>4±1</b>     | <b>0.017</b> | 6±1                    | 16±2           | ns           | 14±1                   | 17±3        | ns | <b>12±2</b>         | <b>21±4</b> | <b>0.030</b> | 16±2                  | 16±4        | ns           |
| <i>FPN1</i> /sFerritin  | <b>2±0.4</b>            | <b>0.3±0.1</b> | <b>0.008</b> | 2±0.3                  | 0.6±0.1        | ns           | 1.8±0.4                | 1.7±0.7     | ns | 1.3±0.2             | 2.4±0.7     | ns           | 1.8±0.4               | 1.7±0.6     | ns           |
| <i>Tfr2</i> / sFe       | <b>9±1</b>              | <b>5±1</b>     | <b>0.009</b> | 14±5                   | 8±1            | ns           | 8±1                    | 9±1         | ns | 8±1                 | 9±1         | ns           | 9±1                   | 9±1         | ns           |
| <i>HAMP</i> / sFe       | 9±2                     | 7±1            | ns           | <b>23±7</b>            | <b>8±1</b>     | <b>0.001</b> | 9±1                    | 9±1         | ns | 9±1                 | 8±1         | ns           | 9±1                   | 10±2        | ns           |
| <i>Hjv</i> / sFe        | <b>7±0.5</b>            | <b>4±0.3</b>   | <b>0.006</b> | 10±3                   | 6±0.4          | ns           | 6±1                    | 7±1         | ns | 6±1                 | 6±1         | ns           | <b>6±0.5</b>          | <b>8±1</b>  | <b>0.022</b> |
| <i>Bmp6</i> / sFe       | <b>7±1</b>              | <b>4±1</b>     | <b>0.016</b> | 14±6                   | 7±1            | ns           | 6±0.4                  | 8±1         | ns | 6±0.5               | 5±1         | ns           | <b>7±1</b>            | <b>8±1</b>  | <b>0.031</b> |
| <i>Id1</i> / sFe        | 10±1                    | 9±2            | ns           | <b>18±4</b>            | <b>9±1</b>     | <b>0.021</b> | 9±1                    | 10±1        | ns | 10±1                | 9±1         | ns           | 10±1                  | 10±2        | ns           |
| <i>HO1</i> / sFe        | <b>13±1</b>             | <b>8±1</b>     | <b>0.034</b> | 17±4                   | 12±1           | ns           | 11±1                   | 13±1        | ns | 11±1                | 15±2        | ns           | 12±1                  | 13±2        | ns           |
| <i>FPN1</i> /sFe        | <b>1.4±0.1</b>          | <b>0.7±0.2</b> | <b>0.041</b> | 1.3±0.1                | 1.4±0.3        | ns           | 1.3±0.1                | 1.4±0.2     | ns | 1.2±0.2             | 1.5±0.2     | ns           | 1.3±0.1               | 1.3±0.3     | ns           |

\*ratio of relative gene expression in liver biopsy normalized to serum ferritin (sFerritin) or serum iron (sFe)

**Table S7.** Spearman rank correlation coefficients for associations between hepatic gene expression and baseline biochemical parameters for CHC patients.

| Relative gene expression | Parameter           |                    |                     |                    |                    |                    |                    |                    |                     |
|--------------------------|---------------------|--------------------|---------------------|--------------------|--------------------|--------------------|--------------------|--------------------|---------------------|
|                          | Age                 | ALT                | AST                 | GGT                | Bilirubin          | sFe                | TS                 | sFerritin          | Liver inflammation  |
| <i>Tfr2</i>              | ns                  | ns                 | ns                  | ns                 | ns                 | ns                 | ns                 | ns                 | ns                  |
| <i>HAMP</i>              | 0.196 <sup>d</sup>  | ns                 | ns                  | 0.221 <sup>d</sup> | ns                 | 0.394 <sup>a</sup> | 0.467 <sup>a</sup> | 0.641 <sup>a</sup> | ns                  |
| <i>Hjv</i>               | -0.201 <sup>d</sup> | ns                 | -0.223 <sup>d</sup> | ns                 | ns                 | ns                 | ns                 | ns                 | -0.293 <sup>c</sup> |
| <i>Bmp6</i>              | -0.214 <sup>d</sup> | ns                 | ns                  | ns                 | ns                 | ns                 | ns                 | ns                 | ns                  |
| <i>Id1</i>               | 0.282 <sup>d</sup>  | 0.245 <sup>d</sup> | 0.244 <sup>d</sup>  | 0.319 <sup>c</sup> | 0.240 <sup>d</sup> | 0.492 <sup>a</sup> | 0.548 <sup>a</sup> | 0.595 <sup>a</sup> | ns                  |
| <i>HO1</i>               | ns                  | 0.308 <sup>c</sup> | 0.319 <sup>c</sup>  | 0.262 <sup>d</sup> | 0.239 <sup>d</sup> | 0.207 <sup>d</sup> | ns                 | 0.292 <sup>d</sup> | ns                  |
| <i>FPN1</i>              | ns                  | ns                 | ns                  | ns                 | ns                 | ns                 | ns                 | ns                 | ns                  |
| <i>Tim3</i>              | ns                  | ns                 | ns                  | ns                 | ns                 | ns                 | ns                 | ns                 | ns                  |
| <i>PD-1</i>              | ns                  | 0.462 <sup>b</sup> | 0.422 <sup>c</sup>  | ns                 | 0.290 <sup>d</sup> | 0.247 <sup>d</sup> | ns                 | ns                 | 0.267 <sup>d</sup>  |
| <i>CTLA4</i>             | ns                  | 0.557 <sup>a</sup> | 0.526 <sup>a</sup>  | ns                 | 0.279 <sup>d</sup> | 0.304 <sup>d</sup> | 0.246 <sup>d</sup> | 0.230 <sup>d</sup> | 0.301 <sup>d</sup>  |

<sup>a</sup>, p<0.00001; <sup>b</sup>, p<0.0001; <sup>c</sup>, p<0.001; <sup>d</sup>, p<0.05; ns, not significant; sFe, serum iron; sFerritin, serum ferritin.

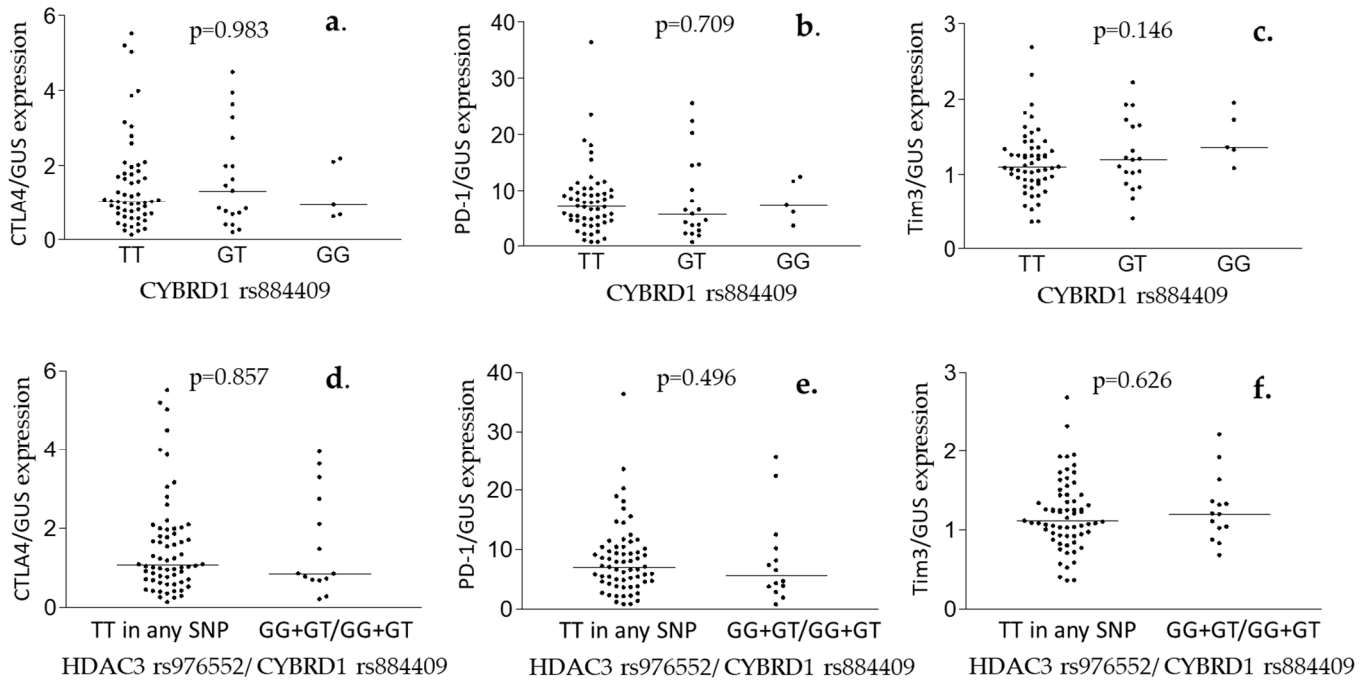

**Figure S4.** Hepatic expression of co-inhibitory receptors in relation to selected genotypes. Hepatic expression of *CTLA4* (a, d), *PD-1* (b, e), and *Tim3* (c, f) in samples from CHC patients with different *CYBRD1* rs884409 (a-c) and *HDAC3* rs976552/*CYBRD1* rs884409 (d-f) genotypes. Shown are the p values from a Kruskal-Wallis test (a-c) or Mann-Whitney U test (d-f).
